# Supplementary material
Source: HighWire-hosted journal article supplement (https://www.g3journal.org/content/suppl/2016/08/16/g3.116.032466)
Supplement: FigureS9.pdf [file FigureS9.pdf]

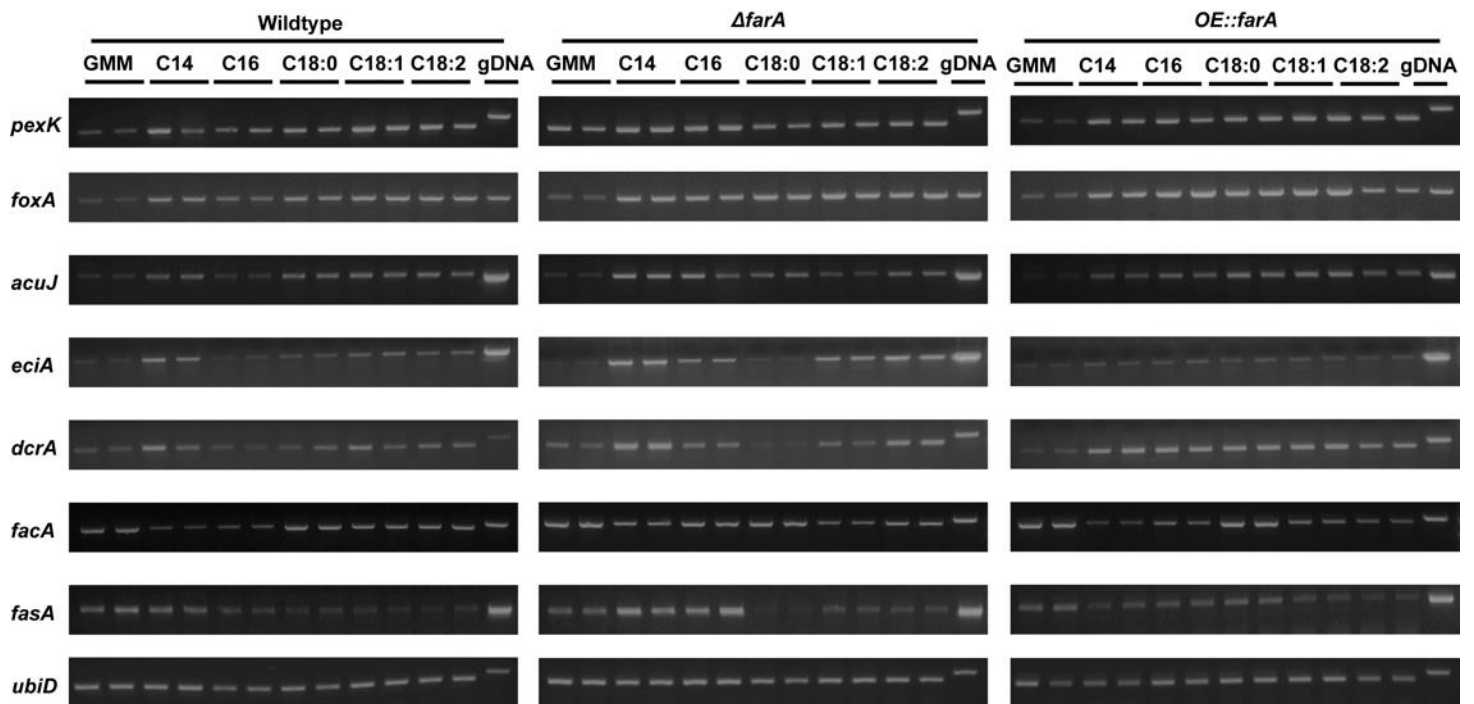

**Figure S9** Expression of genes on *farA* mutants under different carbon sources. Strains were grown for 24 hours in liquid GMM(NH<sub>4</sub><sup>+</sup>)+UU, then transferred to fresh containing minimal medium (UU+1% tergitol+70.6 mM ammonium chloride) with 1% glucose, 2.5 mM myristic acid (C14), 2.5 mM palmitic acid (C16), 2.5 mM stearic acid (C18:0), 2.5 mM oleic acid (C18:1) and 2.5 mM linoleic acid (C18:2). After four hours, mycelia were collected. RNA was extracted and converted to cDNA, and semi-quantitative RT-PCR was performed. Expression of housekeeping gene *ubiD*, which encodes ubiquitin, was included as a control.
